# Supplementary material for: Targeted Silencing of Elongation Factor 2 Kinase Suppresses Growth and Sensitizes Tumors to Doxorubicin in an Orthotopic Model of Breast Cancer
Source: PLOS journal article supplement (doi:10.1371/journal.pone.0041171), 2012-07-20
Supplement: S2 (10.1371/journal.pone.0041171.s002) [file journal.pone.0041171.s002]

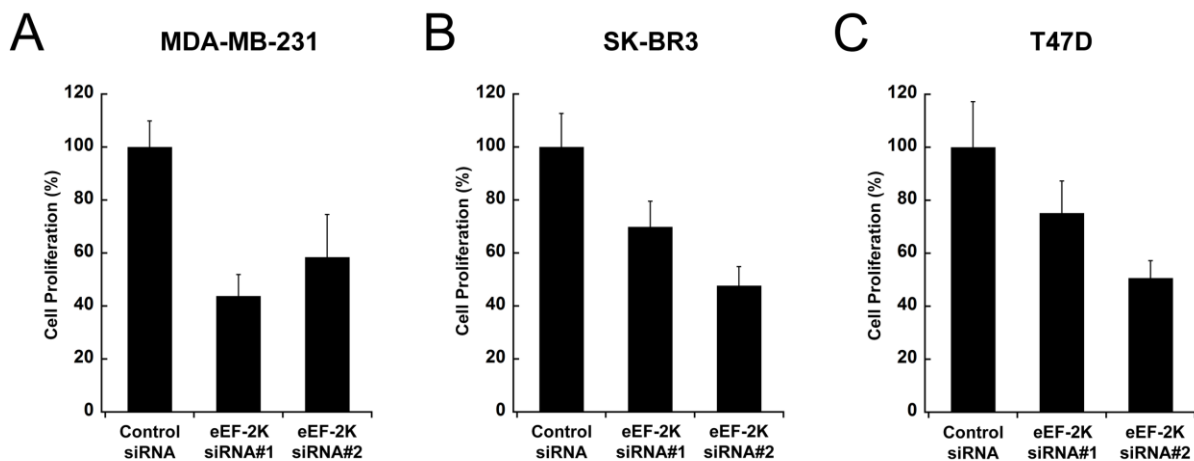

**Figure S2. Effect of knockdown of eEF-2K on cell proliferation.** Cells were transfected with eEF-2K siRNA, and after 48 h proliferation was detected by an MTS assay. Percentage proliferation of (A) MDA-MB-231, (B) SK-BR3 and (C) T47D breast cancer cell lines after treatment with two different siRNA targeting eEF-2K.
